# Supplementary material for: Modeling the measles paradox reveals the importance of cellular immunity in regulating viral clearance
Source: PLOS journal article supplement (doi:10.1371/journal.ppat.1007493), 2018-12-28
Supplement: S23 (10.1371/journal.ppat.1007493.s023) [file journal.ppat.1007493.s023]

**Table S5. Comparison of alternative adjusted cell-cell transmission kinetics using  $AIC_c$ .**

| Individual | Infectious virus | Adjusted cell-to-cell |             |             |
|------------|------------------|-----------------------|-------------|-------------|
|            |                  | 4 neighbors           | 6 neighbors | 8 neighbors |
| <b>15U</b> | <b>0.0</b>       | 48.1                  | 49.8        | 53.0        |
| <b>46U</b> | <b>0.0</b>       | 44.2                  | 43.2        | 41.7        |
| <b>55U</b> | <b>0.0</b>       | 66.2                  | 65.4        | 64.3        |
| <b>67U</b> | <b>0.0</b>       | 4.1                   | 3.8         | 3.6         |
| <b>40V</b> | <b>0.0</b>       | 29.2                  | 29.1        | 28.0        |
| <b>43V</b> | <b>0.0</b>       | 47.8                  | 48.5        | 50.1        |
| <b>55V</b> | <b>0.0</b>       | 60.6                  | 60.9        | 61.6        |

Each row represents a different individual and columns represent different model structures. The original model (with infectious virus) is on the left, and the adjusted cell-cell transmission model (with different numbers of cell neighbors) is on the right. For each individual, numerical values indicate the difference in  $AIC_c$  between each model and the model with the lowest  $AIC_c$  (and hence best statistical support). Zero values (in bold) therefore indicate the best-supported model. For all individuals, the best supported model includes infectious (free) virus.
